# Supplementary material for: Bystander effects elicited by single-cell photo-oxidative blue-light stimulation in retinal pigment epithelium cell networks
Source: PubMed Central journal article supplement (PMC5292780; doi:10.1038/cddiscovery.2016.71), 2017-02-06

Supplemental Figure 1.

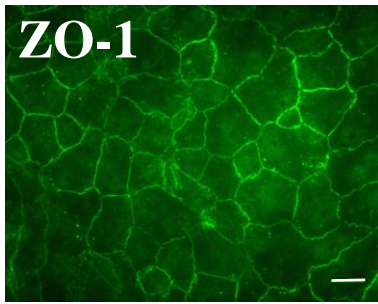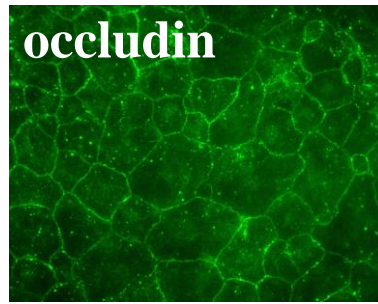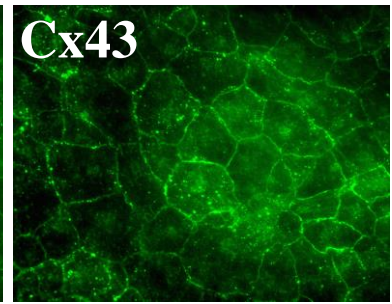

# Supplemental Figure 2.

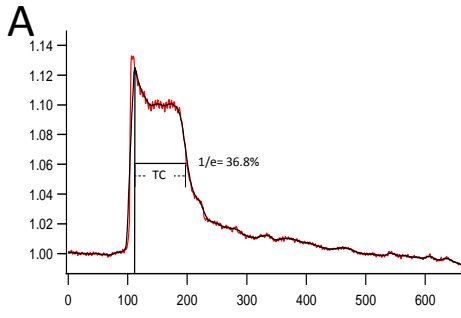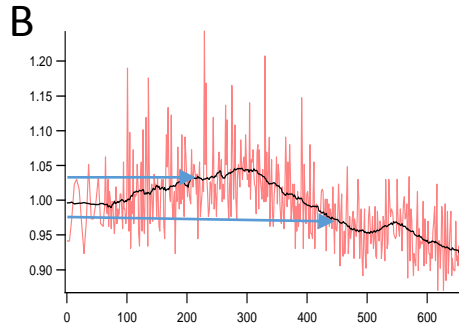

# Supplemental Figure 3

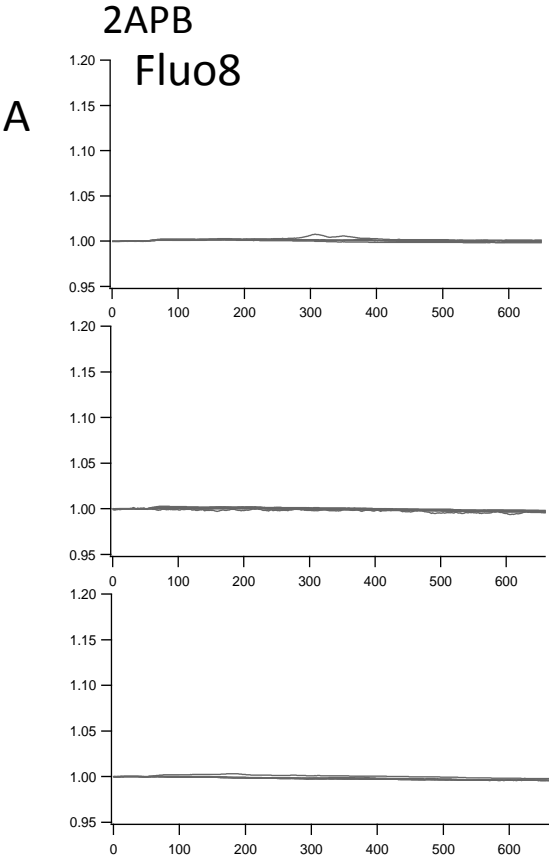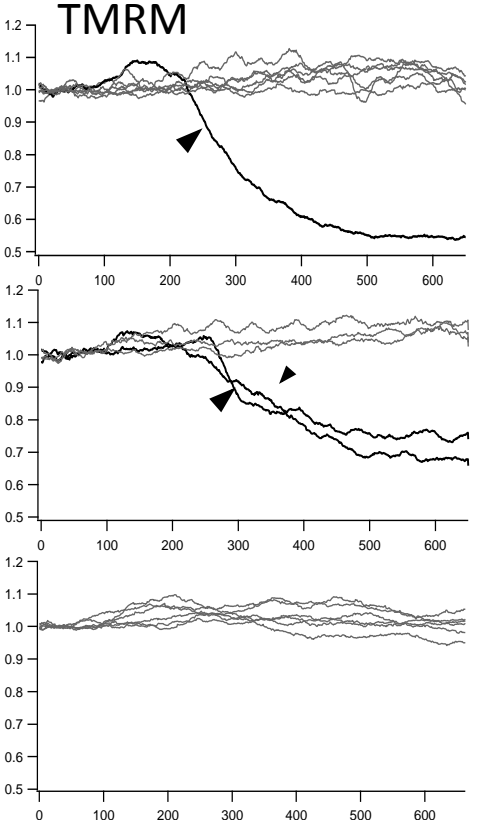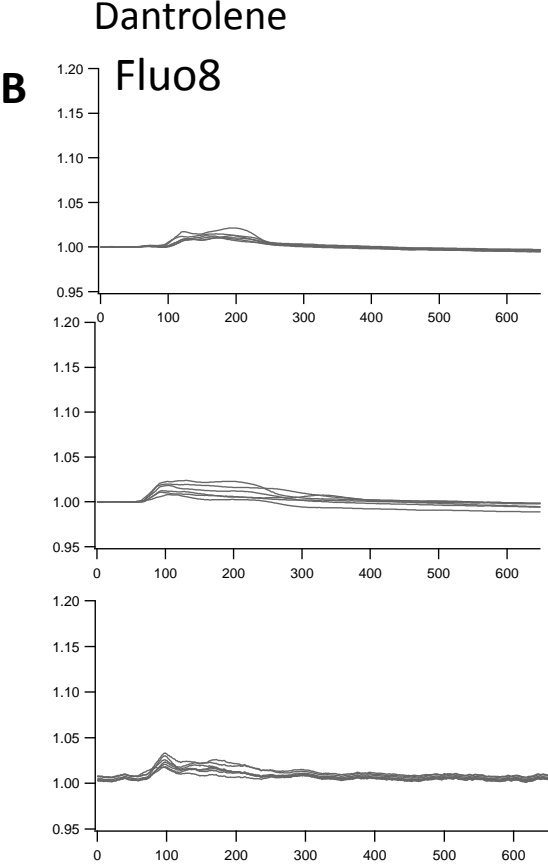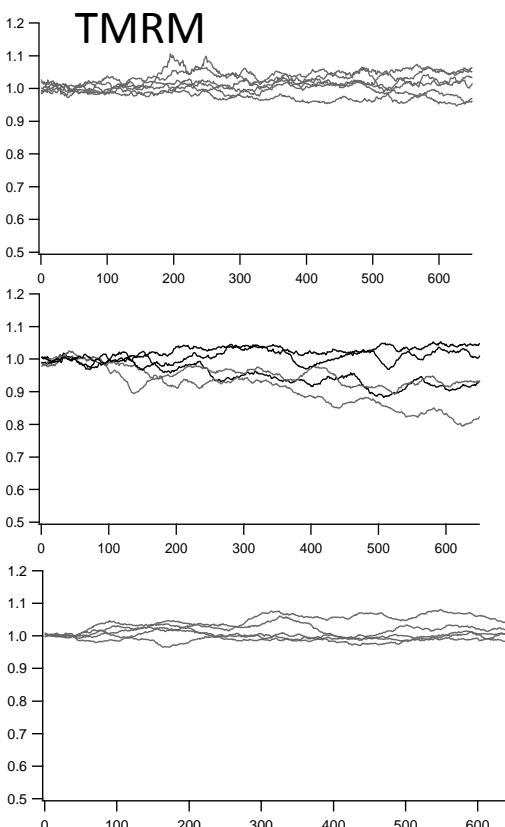

# Thapsigargin

C

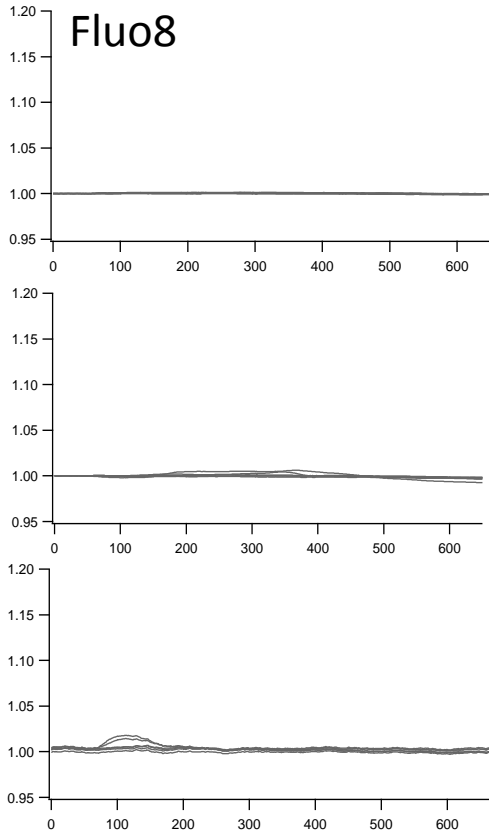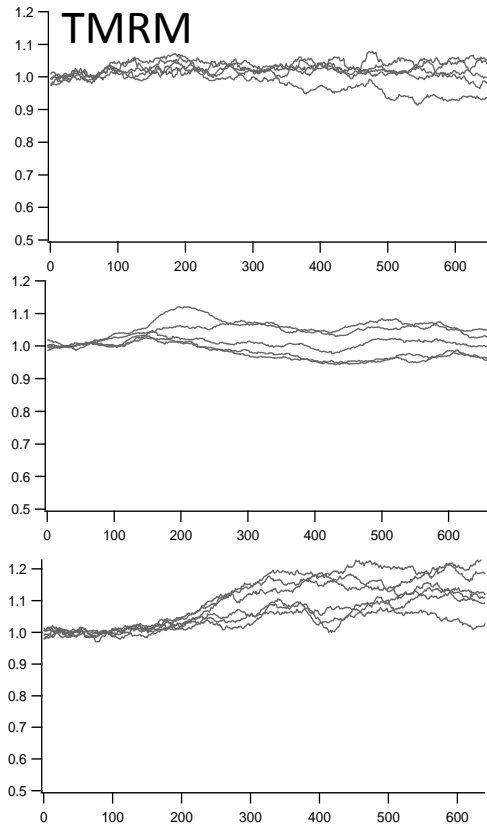

Supplement: cddiscovery201671-s1.pdf [file cddiscovery201671-s1.pdf]
